# Supplementary material for: Tuft cell-derived acetylcholine regulates epithelial fluid secretion
Source: PubMed Central journal article supplement — bioRxiv. 2023 Mar 22:2023.03.17.533208. Preprint. [Version 2] doi: 10.1101/2023.03.17.533208 (PMC10055254; doi:10.1101/2023.03.17.533208), 2023-03-22
Supplement: NIHPP2023.03.17.533208v2-supplement-1.pdf [file NIHPP2023.03.17.533208v2-supplement-1.pdf]

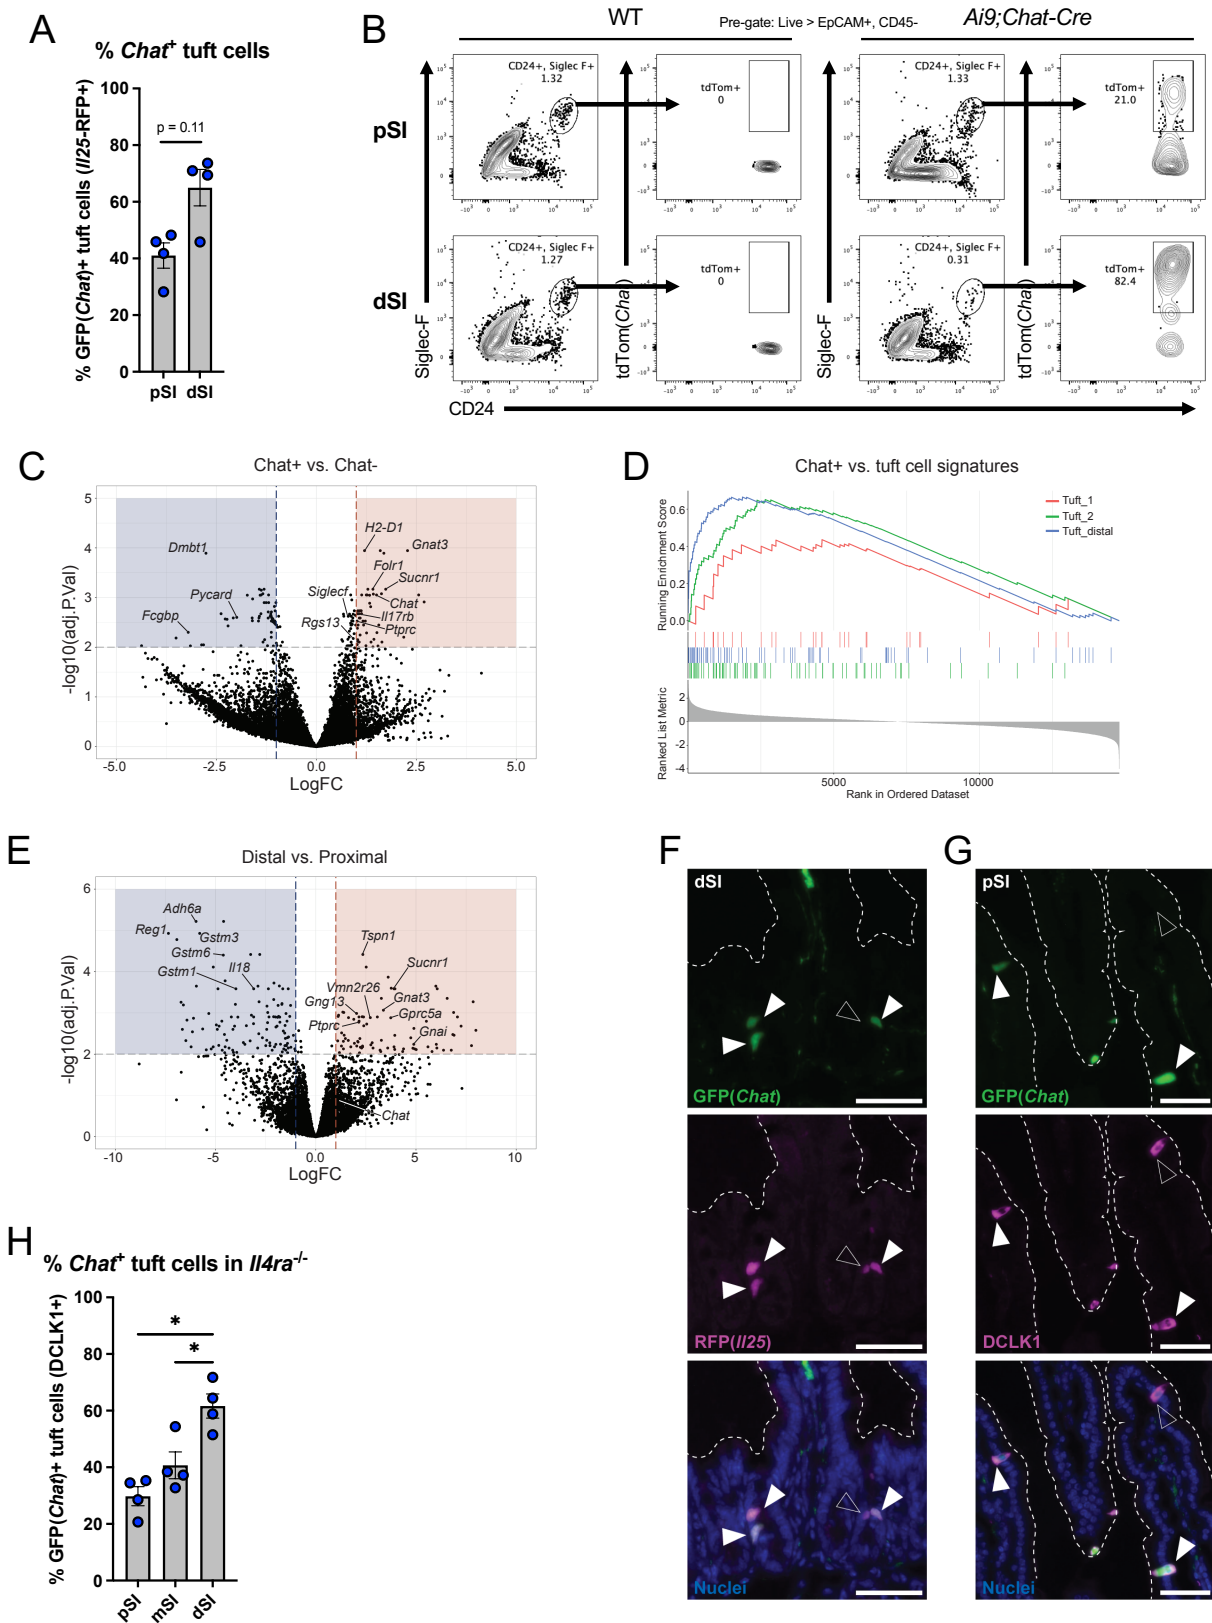

188 **Supplemental Figure 1: (A)** Quantification of GFP+ tuft cells (RFP+) from pSI and dSI of *Chat-*  
189 *GFP;Il25<sup>RFP/+</sup>* mice by immunofluorescence (IF). **(B)** Representative flow cytometry of traced tdTom+ tuft  
190 cells (CD24+, Siglec-F+) from pSI and dSI of wild-type (WT) and *Ai9;Chat-Cre* mice. **(C)** Volcano plot  
191 showing log<sub>2</sub>FC of genes expressed in *Chat*+ tuft cells (n=4) versus *Chat-* tuft cells (n=3) sorted from  
192 whole SI of *Chat-GFP;Il25<sup>RFP/+</sup>* mice. **(D)** Gene set enrichment analysis comparing *Chat*+ tuft cell gene  
193 expression to Tuft-1 and Tuft-2 consensus gene signatures and the dSI tuft cell signature from **(E)**  
194 Volcano plot showing log<sub>2</sub>FC of genes expressed in tuft cells sorted from the dSI (n=4) versus tuft cells  
195 sorted from the pSI (n=4) of B6 mice. **(F)** Representative immunofluorescence image showing GFP+  
196 (green) tuft cells (RFP+, magenta) in the SI crypt (solid white arrows), next to one GFP- tuft cell (open  
197 white arrow). Nuclei stained with DAPI (blue). Scale bars: 50 μm. **(G)** Representative  
198 immunofluorescence image showing a GFP- (green) tuft cell (DCLK1+, magenta) at the villus tip (open  
199 white arrow), past other GFP+ tuft cells (solid white arrows). Nuclei stained with DAPI (blue). Scale bars:  
200 50 μm. **(H)** Quantification of GFP(*Chat*)+ tuft cells (DCLK1+) from denoted tissues of *Il4ra<sup>-/-</sup>;Chat-GFP*  
201 mice by immunofluorescence. In the graphs, each symbol represents an individual mouse (columns  
202 represent different tissues from same mouse) from two pooled experiments. \*p < 0.05, \*\*p < 0.01, \*\*\*p <  
203 0.001 by Mann-Whitney test (A) or one way ANOVA with Tukey's multiple comparisons test (G). mSI,  
204 medial SI. Graphs depict mean +/- SEM.

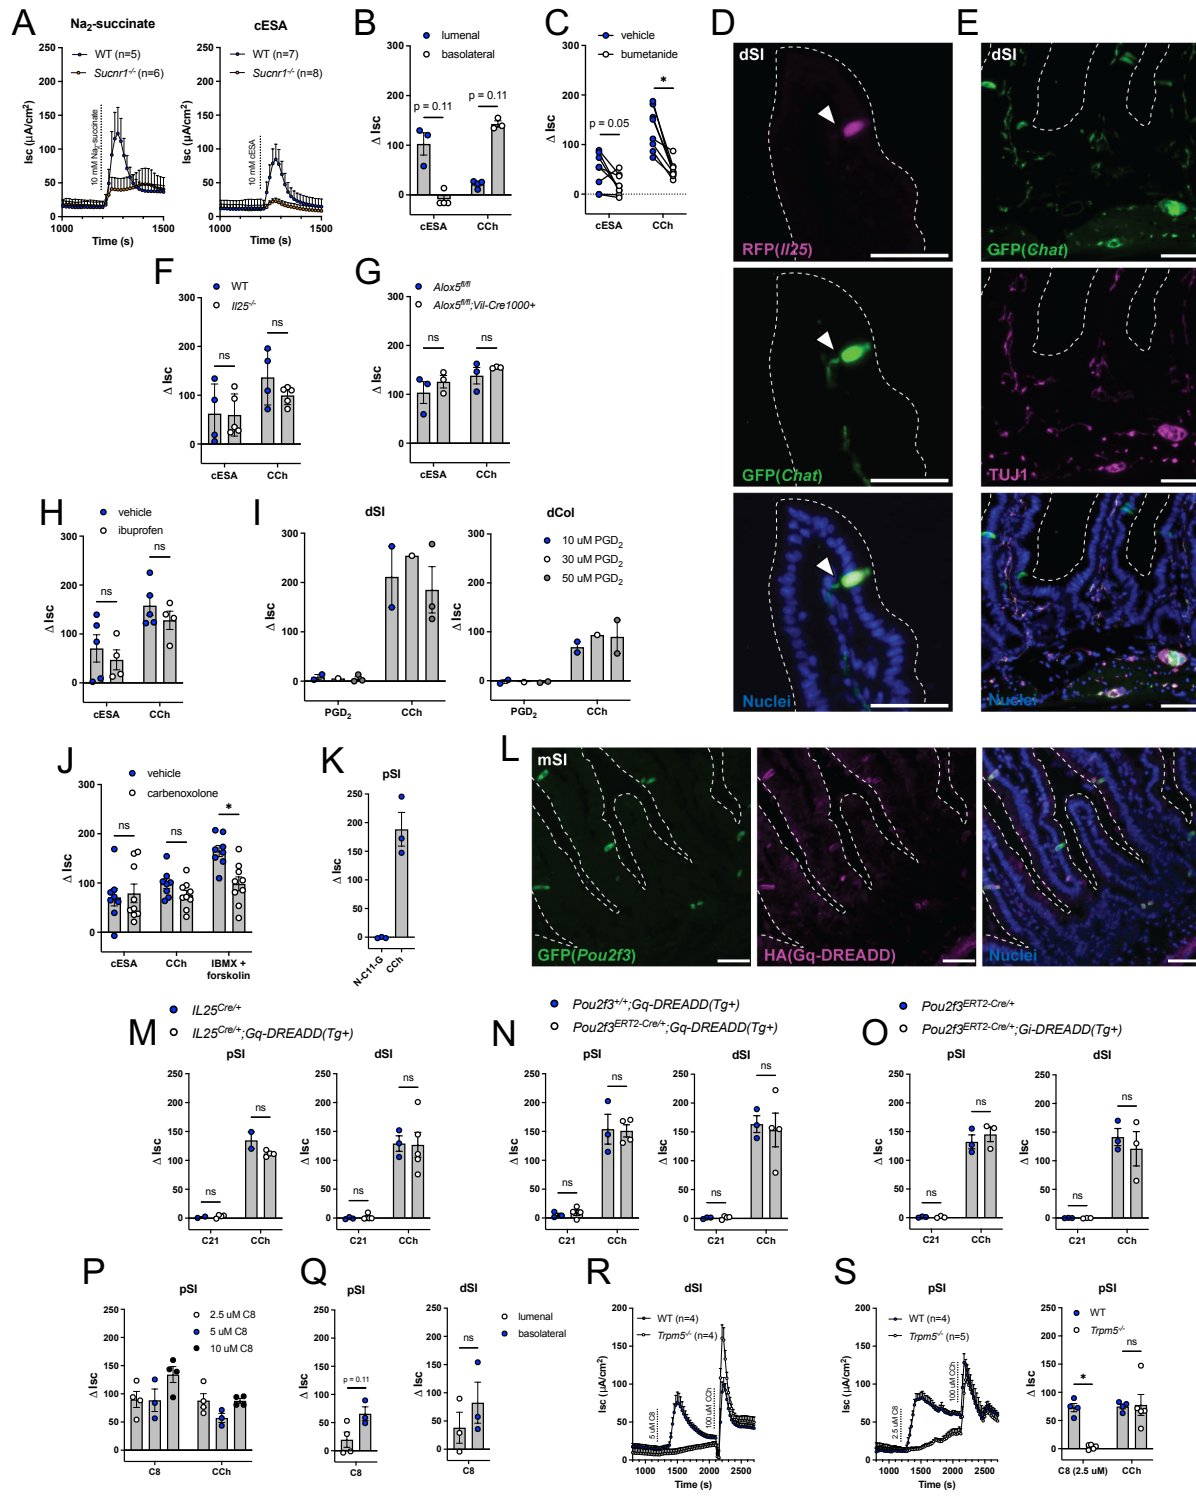

323 **Supplemental Figure 2:** (A) Average Isc traces of dSI from WT or *Sucnr1*<sup>-/-</sup> mice stimulated as indicate  
324 (Na<sub>2</sub>-succinate and cESA, luminal). (B) ΔIsc values of WT dSI stimulated as indicated. (C) ΔIsc values of  
325 WT dSI pretreated 15 min with vehicle or bumetanide (100 μM, basolateral), stimulated as indicated (10  
326 mM cESA luminal; 100 μM CCh, basolateral). (D) Representative immunofluorescence image of a GFP+  
327 (green) neuronal process (indicated by solid white arrow) approaching a GFP+/RFP+ (magenta) tuft cell  
328 from the dSI of *Chat-GFP;Il25*<sup>RFP/+</sup> mice. Nuclei stained with DAPI (blue). Scale bars: 50 μm. (E)  
329 Representative immunofluorescence image of GFP+ (green) neurons co-stained for BIII tubulin (TUJ1,  
330 magenta) in the dSI. Nuclei stained with DAPI (blue). Scale bars: 50 μm. (F, G, and H) (F and G) ΔIsc  
331 values of dSI from indicated genotypes or (H) WT dSI compared to dSI pretreated 15 min with ibuprofen  
332 (10 μM, bilateral), stimulated as indicated. (I) ΔIsc values of WT tissues stimulated as indicated (PGD<sub>2</sub>,  
333 basolateral). (J) ΔIsc values for WT dSI compared to dSI pretreated 15 min with carbenoxolone (1 mM,  
334 luminal), stimulated as indicated (100 μM IBMX + 10 μM forskolin, bilateral). (K) ΔIsc values of WT pSI  
335 stimulated as indicated (100 μM N-C11-G, luminal). (L) Representative immunofluorescence image of  
336 GFP+ (green) tuft cells expressing HA+ Gq-DREADDs (magenta) in the crypts and villi of the medial SI  
337 (mSI). Nuclei stained with DAPI (blue). Scale bars: 50 μm. (M, N, and O) (M) ΔIsc values of indicated  
338 tissues from unmanipulated mice or (N and O) indicated tissues from mice 7 days after start of tamoxifen  
339 chow, stimulated as indicated (1 μM C21, bilateral). (P) ΔIsc values of WT pSI stimulated as indicated  
340 (C8, bilateral). (Q) ΔIsc values of WT tissues from pSI and dSI stimulated as indicated. (R) Average Isc  
341 traces of dSI stimulated as indicated (5 μM C8, basolateral). (S) Average Isc traces and ΔIsc values of  
342 pSI stimulated as indicated (2.5 μM C8, basolateral). In the graphs, each symbol represents an individual  
343 mouse (one tissue or average of two) pooled from two or more experiments. Groups represent sequential  
344 stimulations of the same tissue. In (C) paired vehicle and bumetanide-treated tissues are from the same  
345 mouse. \*p < 0.05, \*\*p < 0.01, \*\*\*p < 0.001, \*\*\*\*p < 0.001 by multiple Mann-Whitney tests with Holm  
346 Sídák's multiple comparisons test (B, F-H, J, M-O, S), Wilcoxon matched-pairs signed rank test with Holm  
347 Sídák's multiple comparisons test (C), or Mann-Whitney test (Q). ns, not significant. Graphs depict mean  
348 +/- SEM.

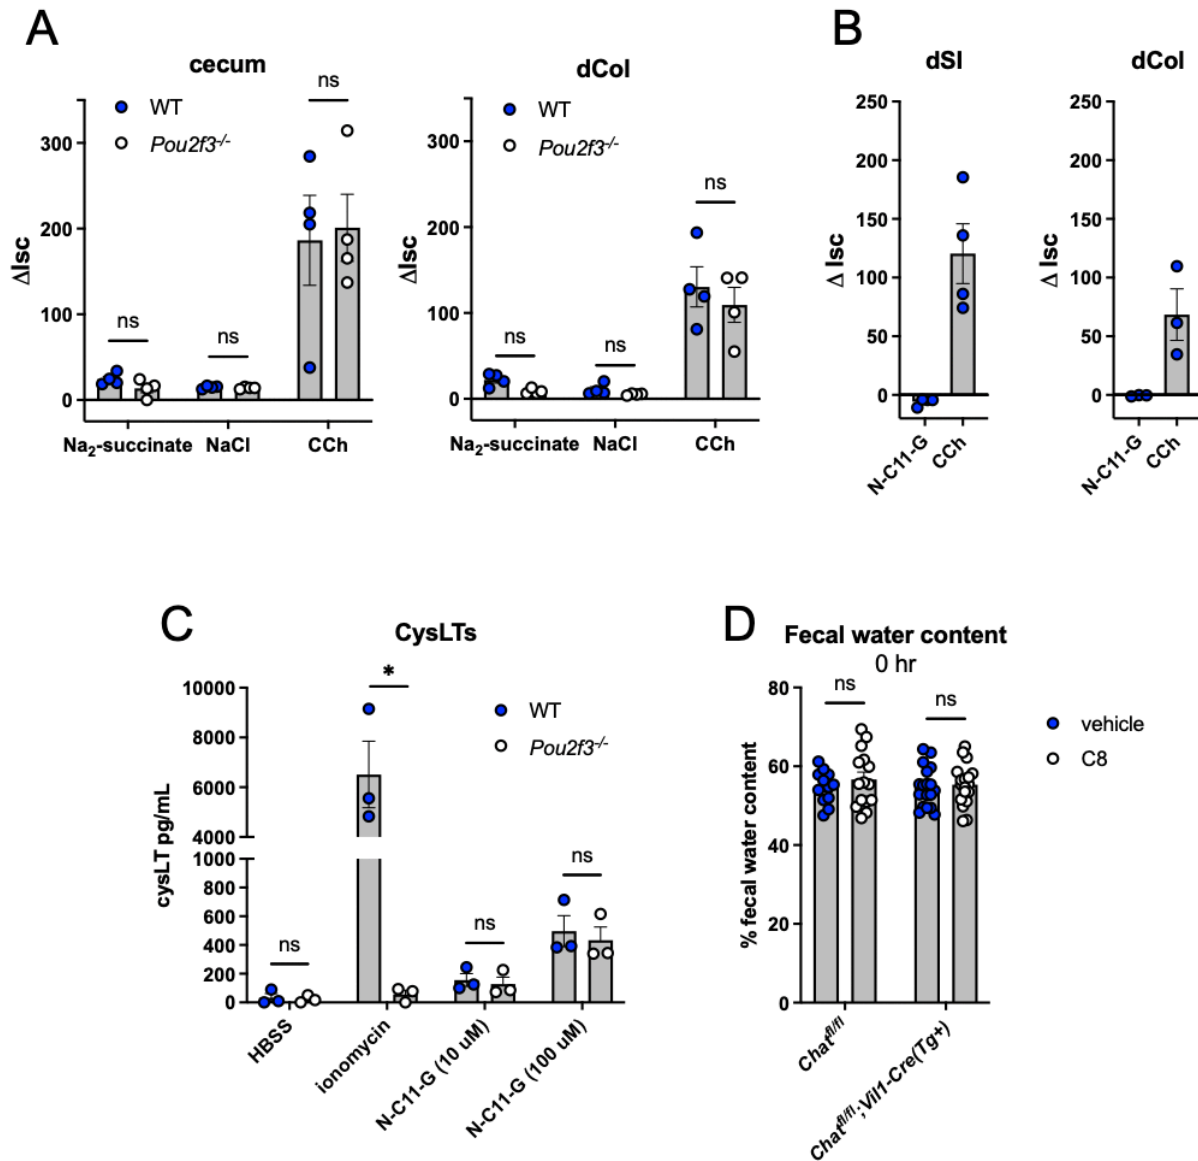

418

419 **Supplemental Figure 3:** (A)  $\Delta I_{sc}$  values of WT and *Pou2f3*<sup>-/-</sup> tissues stimulated as indicated (10 mM Na<sub>2</sub>-  
 420 succinate and 20 mM NaCl, lumenal; 100  $\mu$ M CCh, basolateral). (B)  $\Delta I_{sc}$  values of WT tissues stimulated  
 421 as indicated (100  $\mu$ M N-C11-G, lumenal). (C) Cysteinyl leukotriene (CysLTs) production from WT and  
 422 *Pou2f3*<sup>-/-</sup> SI epithelial monolayers stimulated as indicated. (D) Quantification of water content of fecal  
 423 pellets collected from indicated mice immediately after oral treatment with C8 (30 mg/kg). In the graphs,  
 424 each symbol represents an individual mouse pooled from two or more experiments. In (A-B) groups

425 represent sequential stimulations of the same tissue and in (C) groups represent individual monolayers.  
426 \* $p < 0.05$ , \*\* $p < 0.01$ , \*\*\* $p < 0.001$ , \*\*\*\* $p < 0.001$  by multiple Mann-Whitney tests with Holm Sídák's  
427 multiple comparisons test (A, D), or multiple unpaired t tests with Holm Sídák's multiple comparisons test  
428 (C). ns, not significant. Graphs depict mean +/- SEM.

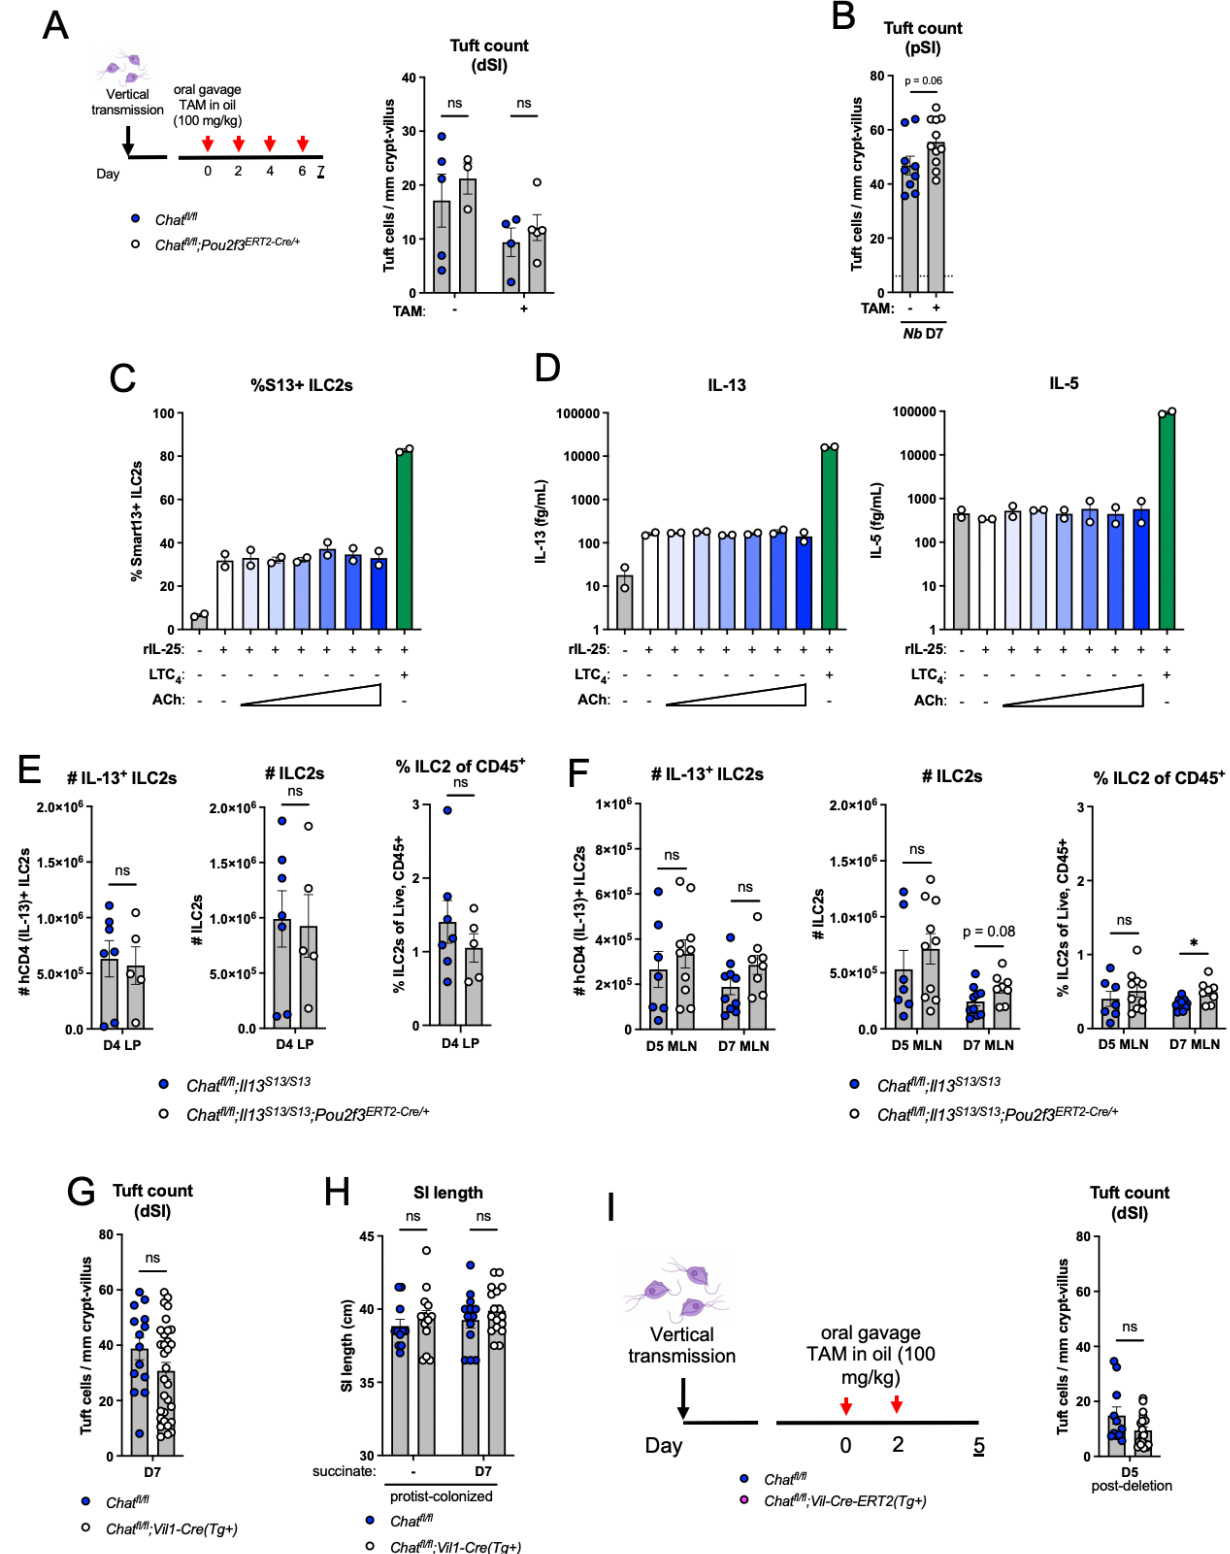

454

455 **Supplemental Figure 4:** (A) Schematic of tamoxifen (TAM) treatment of protist-colonized *Chat-fl;*  
456 *Pou2f3<sup>ERT2-Cre/+</sup>* mice and quantification of dSI tuft counts by immunofluorescence at D7 after start of  
457 treatment. (B) Quantification of pSI tuft counts by immunofluorescence of WT mice treated with or without

458 tamoxifen and infected with *Nb* for 7 days. **(C and D)** (C) Flow cytometric quantification of percent hCD4+  
459 (IL-13+) SILP ILC2s and (D) IL-13 and IL-5 concentration in their supernatant after 6 hr *in vitro* culture  
460 with the indicated conditions (0.1 ng/mL rIL-25, serial 10-fold dilutions of ACh from 10 mM to 0.1  $\mu$ M, 1  
461 nM LTC<sub>4</sub>). **(E and F)** Quantification of number of hCD4+ (IL-13+) ILC2s, total ILC2s, and percent ILC2s at  
462 the indicated timepoints, tissues, and genotypes. **(G)** Quantification of dSI tuft counts by  
463 immunofluorescence from indicated mice treated with 150 mM succinate drinking water for 7 days. **(H)** SI  
464 length from indicated mice vertically-colonized with *T. rainier* protists with or without 7 days of additional  
465 150 mM succinate drinking water treatment. **(I)** Schematic of acute deletion of *Chat* from vertically *T.*  
466 *musculus* (*Tm*) -colonized mice and quantification of dSI tuft counts by immunofluorescence 5 days after  
467 start of treatment. In the (A-B, E-I), each symbol represents an individual mouse from two or more pooled  
468 experiments. In (C and D) each symbol represents a technical replicate of cells sorted from pooled mice.  
469 \*p < 0.05, \*\*p < 0.01, \*\*\*p < 0.001, \*\*\*\*p < 0.001 by multiple Mann-Whitney tests with Holm Sidák's  
470 multiple comparisons test (A, F, H) or Mann-Whitney test (B, E, G, I). ns, not significant. Graphs depict  
471 mean +/- SEM.



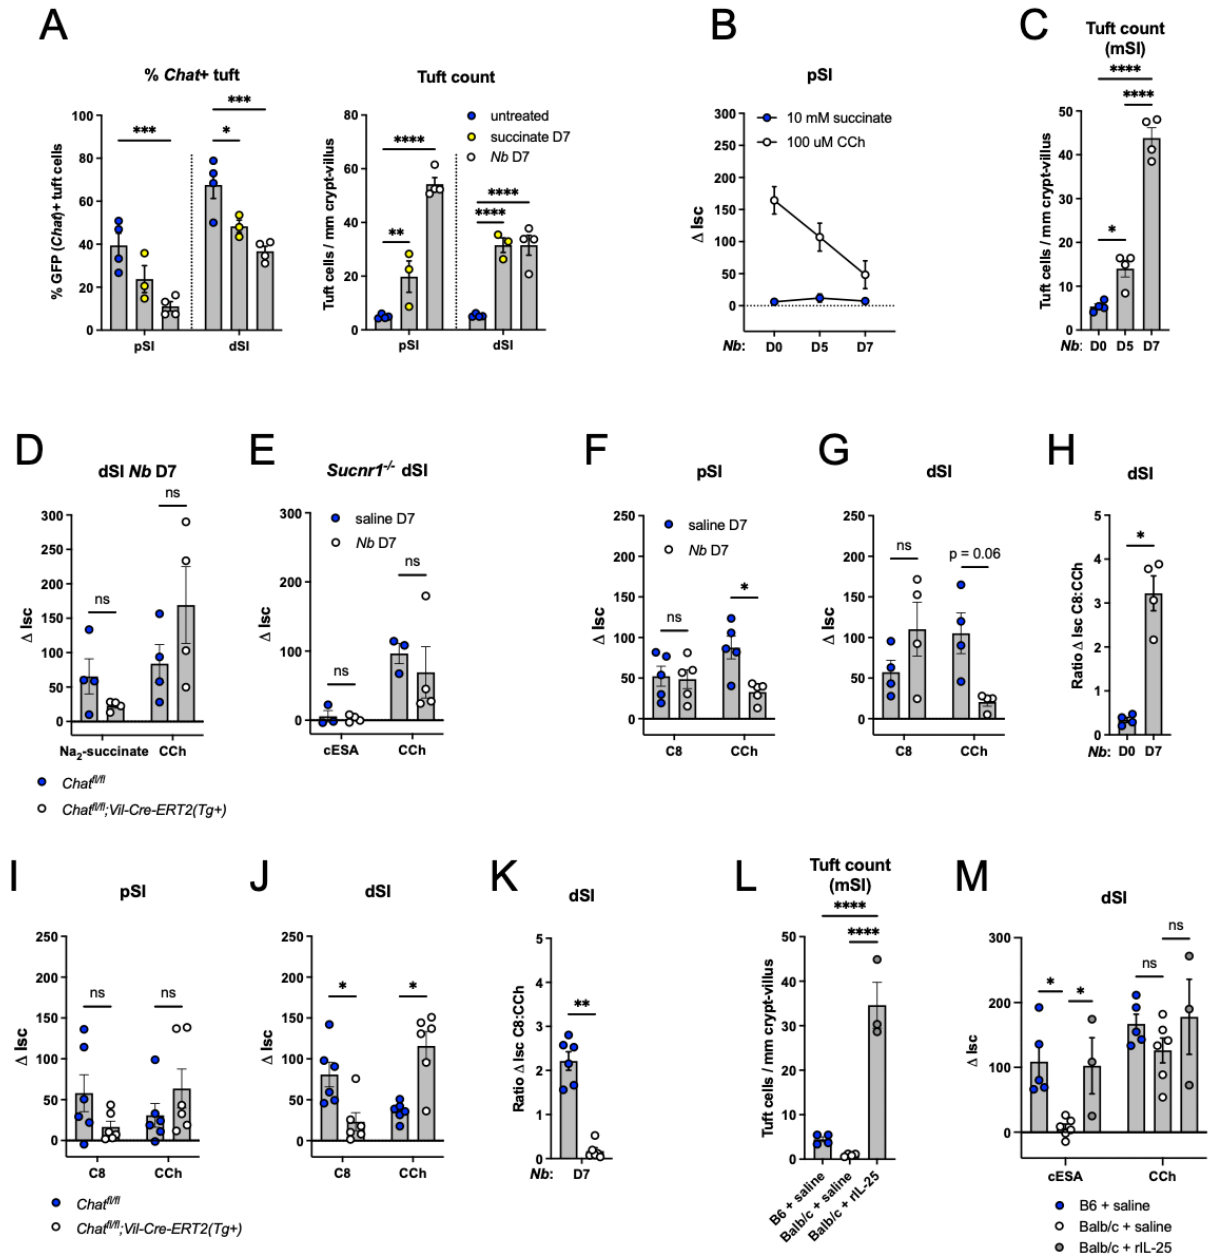

587

588 **Supplemental Figure 5: (A)** Quantification of percent GFP(*Chat*)+ tuft cells and RFP(*Il25*)+ tuft cells from  
 589 the pSI and dSI of WT mice untreated, treated with 150 mM Na<sub>2</sub>-succinate drinking water (succinate), or  
 590 infected with *N. brasiliensis* (*Nb*) for the duration indicated. **(B)**  $\Delta$ Isc values of pSI from WT mice infected  
 591 with *Nb* for the indicated number of days and stimulated as indicated (10 mM succinate, luminal; 100  $\mu$ M  
 592 CCh, basolateral). **(C)** Quantification of tuft cells (DCLK1+) by immunofluorescence from medial SI (mSI)  
 593 of mice in (B). **(D)**  $\Delta$ Isc values of dSI from mice of indicated genotypes infected with *Nb* for 7 days and  
 594 stimulated as indicated. **(E)**  $\Delta$ Isc values of *Sucnr1*<sup>-/-</sup> dSI with or without 7 day *Nb* infection, stimulated as  
 595 indicated. **(F-G)**  $\Delta$ Isc values of (F) pSI and (G) dSI from WT mice with or without 7 day *Nb* infection,  
 596 stimulated as indicated. **(H)** Ratio of C8  $\Delta$ Isc values to CCh  $\Delta$ Isc values in (G). **(I and J)**  $\Delta$ Isc values of (I)

597 pSI and (J) dSI from mice of indicated genotype infected with *Nb* for 7 days, stimulated as indicated. **(K)**  
598 Ratio of C8  $\Delta$ Isc values to CCh  $\Delta$ Isc values from (J). **(L)** Quantification of tuft cells (DCLK1+) by  
599 immunofluorescence in the mSI of mice of indicated genotypes treated as indicated. **(M)**  $\Delta$ Isc values of  
600 dSI from mice in (L) stimulated as indicated. In the graphs, each symbol represents an individual mouse  
601 (one tissue or average of two) from two or more pooled experiments. \* $p < 0.05$ , \*\* $p < 0.01$ , \*\*\* $p < 0.001$ ,  
602 \*\*\*\* $p < 0.001$  by two way ANOVA with Dunnett's multiple comparisons test (A) two way ANOVA with  
603 Tukey's multiple comparisons test (M), Mann-Whitney test (B, H, K), one way ANOVA with Tukey's  
604 multiple comparisons test (C, L), or multiple Mann-Whitney tests with Holm Sidák's multiple comparisons  
605 test (D-G, I-J). ns, not significant. Graphs depict mean +/- SEM.

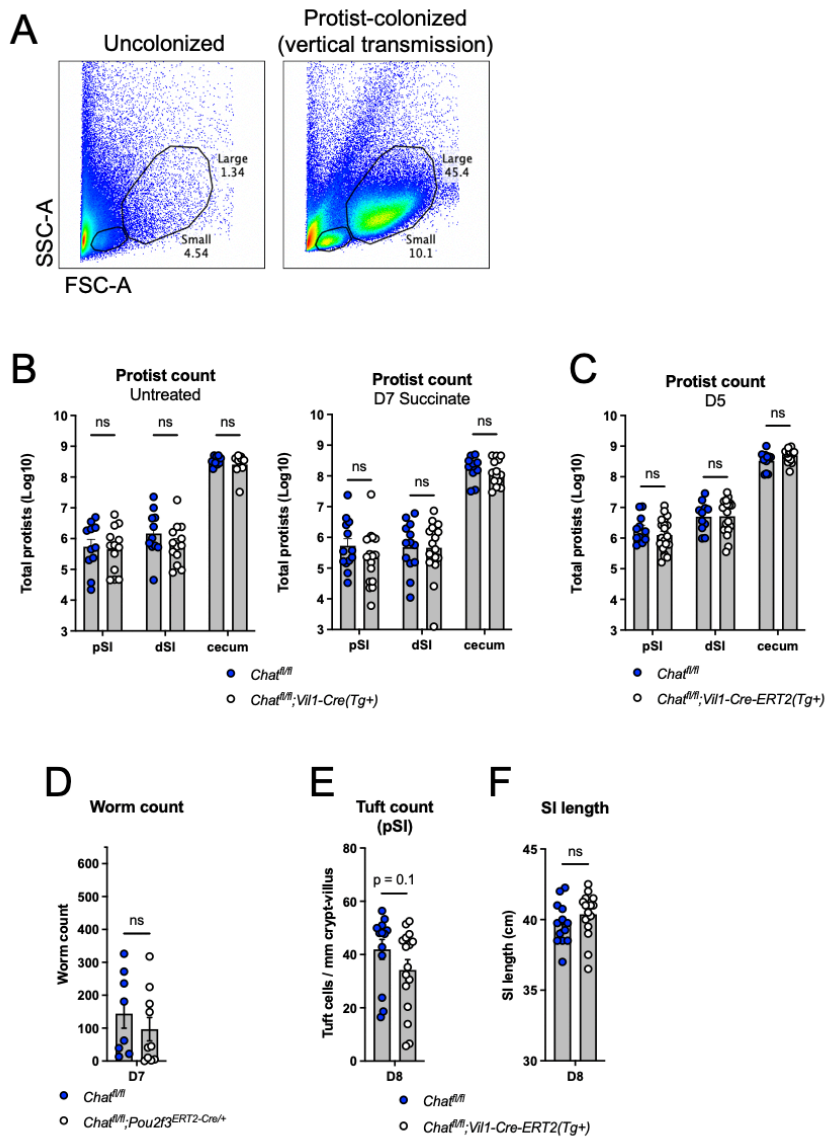

620  
 621 **Supplemental Figure 6:** (A) Representative flow cytometry of cecal contents from uncolonized and  
 622 protist-colonized mice showing gating of protists by size. The “Large” gate contains *Tritrichomonas sp.*  
 623 protists. (B) Quantification of total protists by flow cytometry in indicated tissues of vertically-colonized  
 624 mice of indicated genotypes left untreated or given 150 mM Na<sub>2</sub>-succinate in drinking water for 7 days.  
 625 (C) Quantification of total protists by flow cytometry in indicated tissues of vertically-colonized mice of  
 626 indicated genotypes administered tamoxifen 5 days prior to analysis. (D) Quantification of total SI *Nb*  
 627 in mice of indicated genotype infected with *Nb* for 7 days without tamoxifen administration. (E and F) (E)  
 628 Quantification of tuft cells (DCLK1+) by immunofluorescence and (F) total SI length 8 days post *Nb*  
 629 infection of mice of indicated genotype given a single dose of tamoxifen (125 mg/kg) on day 5. In the  
 630 graphs, each symbol represents an individual mouse (one tissue or average of two) from two or more  
 631 pooled experiments. \*p < 0.05, \*\*p < 0.01, \*\*\*p < 0.001, \*\*\*\*p < 0.001 by multiple Mann-Whitney tests with

632 Holm Sídák's multiple comparisons test (B-C) or Mann-Whitney test (D-F). ns, not significant. Graphs  
633 depict mean +/- SEM.

1031

**Table S3**

| Reagent or Resource                                                                  | Source                           | Identifier  |
|--------------------------------------------------------------------------------------|----------------------------------|-------------|
| B6.Cg-Tg(RP23-268L19-EGFP)2Mik/J (Chat-GFP)                                          | Jackson Laboratory               | JAX #007902 |
| B6. <i>Il25</i> <sup>Flare25/Flare25</sup> (Il25-RFP)                                | R. Locksley (PMID: 26675736)     | NA          |
| B6. <i>Il13</i> <sup>Smart13/Smart13</sup> (Smart13)                                 | R. Locksley (PMID: 22138715)     | NA          |
| C57BL/6N-Pou2f3 <sup>tm1(KOMP)Vlcg&gt;/Tcp</sup> ( <i>Pou2f3</i> <sup>-/-</sup> )    | Canadian Mouse Mutant Repository | CMMR #ABDF  |
| B6.129P2-Trpm5 <sup>tm1Dgen/J</sup> ( <i>Trpm5</i> <sup>-/-</sup> )                  | Jackson Laboratory               | JAX #005848 |
| B6. <i>Sucnr1</i> <sup>-/-</sup>                                                     | In-house (PMID: 30021144)        | NA          |
| B6. <i>Il25</i> <sup>-/-</sup>                                                       | A. McKenzie (PMID: 16606668)     | NA          |
| B6;129-Chat <sup>tm1Jrs/J</sup> ( <i>Chat</i> <sup>fl/fl</sup> )                     | Jackson Laboratory               | JAX #016920 |
| B6.Cg-Tg(Vil1-cre)997Gum/J                                                           | Jackson Laboratory               | JAX #004586 |
| B6.Cg-Tg(Vil1-cre)1000Gum/J (Vil1-Cre1000)                                           | Jackson Laboratory               | JAX #021504 |
| B6.Cg-Tg(Vil1-cre/ERT2)23Syr/J ( <i>Vil1-Cre-Ert2</i> )                              | Jackson Laboratory               | JAX #020282 |
| B6(129S4)- <i>Pou2f3</i> <sup>tm1.1(cre/ERT2)lmt/J</sup> ( <i>Pou2f3-Cre-Ert2</i> )  | Jackson Laboratory               | JAX #037511 |
| B6.129S-Chat <sup>tm1(cre)Lowl/MwarJ</sup> ( <i>Chat-Cre</i> )                       | Jackson Laboratory               | JAX #031661 |
| B6. <i>Il25-Cre</i>                                                                  | R. Locksley (PMID: 35245089)     | NA          |
| B6.Cg-Gt( <i>ROSA</i> )26Sor <sup>tm9(CAG-tdTomato)Hze/J</sup> (Ai9)                 | Jackson Laboratory               | JAX #007909 |
| B6N;129-Tg(CAG-CHRM3*, -mCitrine)1Ute/J (Gq-DREADD)                                  | Jackson Laboratory               | JAX #026220 |
| B6.129-Gt( <i>ROSA</i> )26Sor <sup>tm1(CAG-CHRM4*, -mCitrine)Ute/J</sup> (Gi-DREADD) | Jackson Laboratory               | JAX #026219 |
| B6. <i>Alox5</i> <sup>fl/fl</sup>                                                    | In-house (PMID: 32160525)        | NA          |
| B6. <i>Il4ra</i> <sup>fl/fl</sup>                                                    | F. Brombacher (PMID: 15142530)   | NA          |

1032

1033 **Table S4**

| <b>Reagent or Resource</b>               | <b>Dilution Factor</b> | <b>Source</b> | <b>Identifier</b> |
|------------------------------------------|------------------------|---------------|-------------------|
| Rabbit $\alpha$ -DCLK1                   | 1:1000                 | Abcam         | Cat#ab31704       |
| Rabbit $\alpha$ -TUJ1 (Beta-III tubulin) | 1:500                  | Abcam         | Cat#ab18207       |
| Goat $\alpha$ -GFP                       | 1:500                  | Novus Bio     | Cat#NB100-1770    |
| Rabbit $\alpha$ -dsRed                   | 1:500                  | Clontech      | Cat#632496        |
| Rabbit $\alpha$ -HA, clone 16B12         | 1:1000                 | Biolegend     | Cat#901516        |
| WGA-488                                  | 1:150                  | Thermo        | Cat#W11261        |
| Donkey $\alpha$ -Rabbit IgG AF594        | 1:1000                 | Thermo        | Cat#A-21207       |
| Donkey $\alpha$ -Goat IgG AF488          | 1:500                  | Thermo        | Cat#A-11055       |
| CD16 / CD32, clone 2.4G2                 | 1:1000                 | Tonbo         | Cat# 70-0161-M001 |
| CD3 PerCP-Cy5.5, clone 145-2C11          | 1:100                  | Biolegend     | Cat#100328        |
| CD3 BV421, clone 145-2C11                | 1:400                  | Biolegend     | Cat#100335        |
| CD4 BV711, clone RM4-5                   | 1:250                  | Biolegend     | Cat#100549        |
| CD4 eF450, clone RM4-5                   | 1:200                  | eBioscience   | Cat# 48-0042-80   |
| hCD4 PE, clone RPA-T4                    | 1:50                   | Biolegend     | Cat#300508        |
| CD5 PerCP-Cy5.5, clone 53-7.3            | 1:500                  | Biolegend     | Cat#100624        |
| CD5 eF450, clone 53-7.3                  | 1:400                  | Biolegend     | Cat#100607        |
| CD8 PerCP-Cy5.5, clone 53-6.7            | 1:200                  | Biolegend     | Cat#100724        |
| CD8 BV421, clone 53-6.7                  | 1:400                  | Biolegend     | Cat#100737        |
| CD11b AF700, clone M1/70                 | 1:250                  | Biolegend     | Cat#101222        |
| CD11b BV421, clone M1/70                 | 1:400                  | Biolegend     | Cat# 101235       |
| CD19 PerCP-Cy5.5, clone 6D5              | 1:250                  | Biolegend     | Cat#115533        |
| CD19 BV421, clone 6D5                    | 1:400                  | Biolegend     | Cat# 115537       |

|                                     |       |           |             |
|-------------------------------------|-------|-----------|-------------|
| CD24 PE, clone M1/69                | 1:300 | Biolegend | Cat#101807  |
| CD24 PerCP-Cy5.5, clone M1/69       | 1:300 | Biolegend | Cat#101824  |
| CD45 BV605, clone 30F11             | 1:300 | Biolegend | Cat#103155  |
| CD45 BV650, clone 30F11             | 1:500 | Biolegend | Cat#103151  |
| EpCAM PE-Dazzle, clone G8.8         | 1:300 | Biolegend | Cat#118235  |
| EpCAM AF488, clone G8.8             | 1:300 | Biolegend | Cat#118210  |
| EpCAM PE-Cy7, clone G8.8            | 1:300 | Biolegend | Cat#118215  |
| FcER1 BV421, clone Mar-1            | 1:400 | Biolegend | Cat#334623  |
| IL17RB APC, clone 9B10              | 1:100 | Biolegend | Cat#146307  |
| KLRG1 PE-Cy7, clone 2F1             | 1:250 | Biolegend | Cat#138416  |
| NK1.1 PerCP-Cy5.5, clone PK136      | 1:100 | Biolegend | Cat#108728  |
| NK1.1 BV421, clone PK136            | 1:200 | Biolegend | Cat#108731  |
| Siglec-F APC-Cy7, clone E50-2440    | 1:100 | BD        | Cat#565527  |
| Siglec-F AF647, clone E50-2440      | 1:100 | BD        | Cat# 562680 |
| Thy1.2 (CD90.2) BV605, clone 53-2.1 | 1:500 | Biolegend | Cat#140318  |

1034  
1035  
1036  
1037  
1038
